# Supplementary material for: Assessment of the potential impact of a reminder system on the reduction of diagnostic errors: a quasi-experimental study
Source: Springer Nature journal article supplement (doi:10.1186/1472-6947-6-22), 2006-04-28
Supplement: 12911_2005_111_MOESM3_ESM.pdf [file 12911_2005_111_MOESM3_ESM.pdf]

A 6-week old infant is admitted with a week's history of poor feeding. Whereas previously the infant had been growing along the 25th centile, he has now fallen below the 10th centile. In the past week, his parents also think he is breathing quite quickly. He has a cough and is vomiting most feeds.

On examination, he is tachypnoeic, has moderate respiratory distress, and a cough. A grade 3 murmur is heard all over his precordium. He also has a 3 cm liver palpable.

Initial lab results show Haemoglobin 9 g/dL, White cell count  $12.4 \times 10^6/\mu\text{L}$ , Platelets  $180 \times 10^6/\mu\text{L}$ .

\*This case was assigned to Cardiology and case level 2 by both investigators

|        |                                                                                                                                                                                                                  |
|--------|------------------------------------------------------------------------------------------------------------------------------------------------------------------------------------------------------------------|
| User A | failure to thrive, growth below 10th centile, previous growth on 25th centile, tachypnoeic, moderate respiratory distress, cough, precordial grade 3 murmur, palpable liver 3cm, neutrophilia, thrombocytophilia |
| User B | poor feeding for 1/52, FTT, DIB + COUGH + vomiting, HEART MURMUR, liver palpable                                                                                                                                 |
| User C | Weight loss, cough, vomiting, respiratory distress, heart murmur, hepatomegaly                                                                                                                                   |
| User D | poor feeding, failure to thrive, tachypnoeic, cough, vomiting, respiratory distress, heart murmur, large liver, anaemia                                                                                          |
| User E | poor feeding, wt loss, tafchypneic, cardiac murmur                                                                                                                                                               |

| <b>'Most likely diagnosis'</b> | <b>'Clinically important' diagnoses (panel)</b>                                        |
|--------------------------------|----------------------------------------------------------------------------------------|
| Ventricular septal defect      | Ventricular septal defect (or other congenital heart disease with left to right shunt) |
|                                | Nasopharyngitis (or Bronchiolitis)                                                     |
