# Supplementary material for: Assessment of the potential impact of a reminder system on the reduction of diagnostic errors: a quasi-experimental study
Source: Springer Nature journal article supplement (doi:10.1186/1472-6947-6-22), 2006-04-28

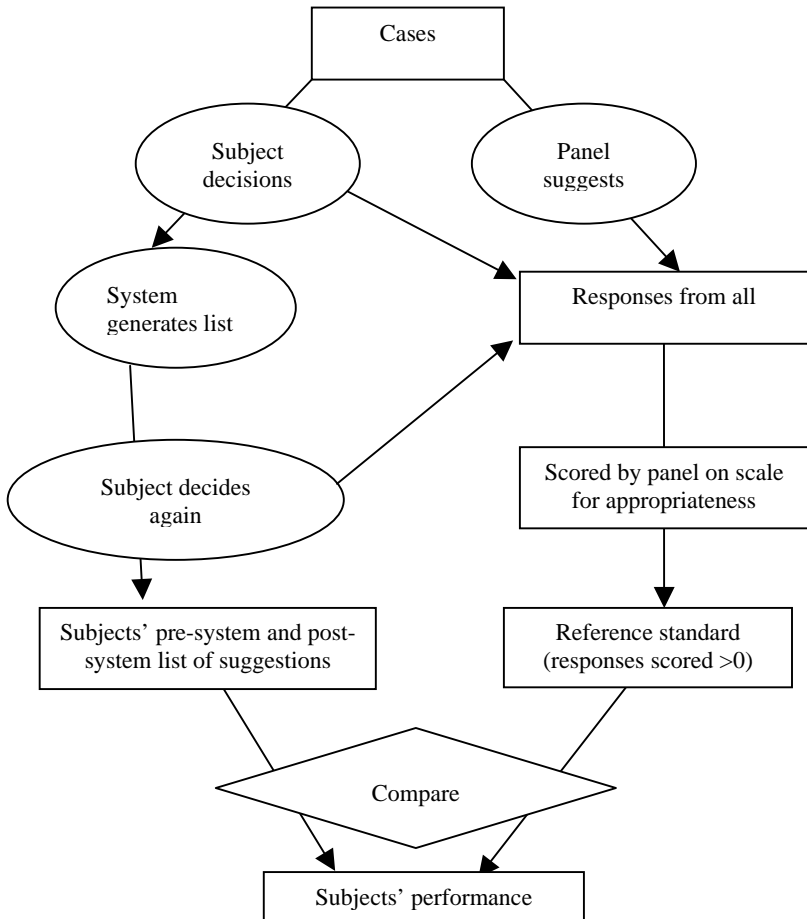

Supplement: 12911_2005_111_MOESM4_ESM.pdf [file 12911_2005_111_MOESM4_ESM.pdf]
